# Supplementary material for: Evaluation of the pKa's of Quinazoline Derivatives : Usage of Quantum Mechanical Based Descriptors
Source: Research Square preprint supplement (doi:10.21203/rs.3.rs-3304183/v1), 2023-09-02
Supplement: Supplementary file 1 [file 98c2956062b9c7b77cdb2809.pdf]

# Supplementary Information

*for*

## Evaluation of the $pK_a$ 's of Quinazoline Derivatives :

### Usage of Quantum Mechanical Based Descriptors

Melisa Kiran<sup>1,‡</sup>, Zeynep Pinar Haslak<sup>1,2,‡</sup>, Halit Ates<sup>1</sup>, Viktorya Aviyente<sup>1,\*</sup>, Fatma Ahu Akin<sup>1,\*</sup>

<sup>1</sup> Bogazici University, Department of Chemistry, 34342, Bebek, Istanbul, Turkey

<sup>2</sup> Université de Reims Champagne-Ardenne, 51687, Reims, France

Correspondance: akin@boun.edu.tr, aviye@boun.edu.tr

<sup>‡</sup>These authors contributed equally.

## List of Figures

- S1: Linear regression between experimental  $pK_a$  and (a) calculated electrophilicity index ( $\omega$ ) and (b) calculate chemical potential ( $\mu$ ) at M06L/6-311++G(d,p) level of theory with CPCM solvation model.....S-5
- S2: Linear regression between experimental  $pK_a$  and calculated (a) nucleophilic fukui function ( $f^+$ ) and (b) electrophilic fukui function ( $f^-$ ) on  $N_1$  atom at M06L/6-311++G(d,p) level of theory with CPCM solvation model.....S-5
- S3: Linear regression between experimental  $pK_a$  and calculated condensed dual function ( $\Delta f = \max\{\Delta f(N_1), \Delta f(N_3)\}$ ) at M06L/6-311++G(d,p) level of theory with CPCM solvation model.....S-6

## List of Tables

- S1: Statistics for the quinazoline derivatives training set:  $R^2$ , MAD and  $MAX-\Delta pK_a$  for different DFT methods, basis sets and solvation models using the  $Q = q(N_1)$  atomic charge descriptor.....S-7
- S2: Statistics for the quinazoline derivatives training set:  $R^2$ , MAD and  $MAX-\Delta pK_a$  for different DFT methods, basis sets and solvation models using the  $Q = q(N_3)$  atomic charge descriptor..... S-8
- S3: Statistics for the quinazoline derivatives training set:  $R^2$ , MAD and  $MAX-\Delta pK_a$  for different DFT methods, basis sets and solvation models using the  $Q = \max\{q(N_1), q(N_3)\}$  atomic charge descriptor.....S-9
- S4: Statistics for the quinazoline derivatives training set:  $R^2$ , MAD and  $MAX-\Delta pK_a$  for different DFT methods, basis sets and solvation models using the  $Q = \min\{q(N_1), q(N_3)\}$  atomic charge descriptor.....S-10
- S5: Statistics for the quinazoline derivatives training set:  $R^2$ , MAD and  $MAX-\Delta pK_a$  for different DFT methods, basis sets and solvation models using the  $Q = \text{avg}\{q(N_1), q(N_3)\}$  atomic charge descriptor.....S-11
- S6: Statistics for the quinazoline derivatives training set:  $R^2$ , MAD and  $MAX-\Delta pK_a$  for different DFT methods and solvation models using the 6-311++G(d,p) basis set and ionization energy ( $I$ ) as descriptor.....S-12
- S7: Statistics for the quinazoline derivatives training set:  $R^2$ , MAD and  $MAX-\Delta pK_a$  for different DFT methods and solvation models using the 6-311++G(d,p) basis set and electron affinity ( $A$ ) as descriptor.....S-12
- S8: Statistics for the quinazoline derivatives training set:  $R^2$ , MAD and  $MAX-\Delta pK_a$  for different DFT methods and solvation models using the 6-311++G(d,p) basis set and electrophilicity index ( $\omega$ ) as descriptor.....S-12
- S9: Statistics for the quinazoline derivatives training set:  $R^2$ , MAD and  $MAX-\Delta pK_a$  for different DFT methods and solvation models using the 6-311++G(d,p) basis set and chemical hardness ( $\eta$ ) as descriptor.....S-13
- S10: Statistics for the quinazoline derivatives training set:  $R^2$ , MAD and  $MAX-\Delta pK_a$  for different DFT methods and solvation models using the 6-311++G(d,p) basis set and chemical potential ( $\mu$ ) as descriptor.....S-13
- S11: Statistics for the quinazoline derivatives training set:  $R^2$ , MAD and  $MAX-\Delta pK_a$  for different DFT methods and solvation models using the 6-311++G(d,p) basis set and  $\bar{X} = f^-(N_1)$  electrophilic fukui function as descriptor..... S-13
- S12: Statistics for the quinazoline derivatives training set:  $R^2$ , MAD and  $MAX-\Delta pK_a$  for different DFT methods and solvation models using the 6-311++G(d,p) basis set and  $\bar{X} = f^-(N_3)$  electrophilic fukui function as descriptor.....S-14

|                                                                                                                                                                                                                                                                                        |      |
|----------------------------------------------------------------------------------------------------------------------------------------------------------------------------------------------------------------------------------------------------------------------------------------|------|
| S13: Statistics for the quinazoline derivatives training set: $R^2$ , MAD and $MAX-\Delta pK_a$ for different DFT methods and solvation models using the 6-311++G(d,p) basis set and $\dot{X} = \max\{f^-(N_1), f^-(N_3)\}$ electrophilic fukui function as descriptor.....            | S-14 |
| S14: Statistics for the quinazoline derivatives training set: $R^2$ , MAD and $MAX-\Delta pK_a$ for different DFT methods and solvation models using the 6-311++G(d,p) basis set and $\dot{X} = \min\{f^-(N_1), f^-(N_3)\}$ electrophilic fukui function as descriptor.....            | S-14 |
| S15: Statistics for the quinazoline derivatives training set: $R^2$ , MAD and $MAX-\Delta pK_a$ for different DFT methods and solvation models using the 6-311++G(d,p) basis set and $\dot{X} = \text{avg}\{f^-(N_1), f^-(N_3)\}$ electrophilic fukui function as descriptor.....      | S-15 |
| S16: Statistics for the quinazoline derivatives training set: $R^2$ , MAD and $MAX-\Delta pK_a$ for different DFT methods and solvation models using the 6-311++G(d,p) basis set and $\dot{X} = f^+(N_1)$ nucleophilic fukui function as descriptor.....                               | S-15 |
| S17: Statistics for the quinazoline derivatives training set: $R^2$ , MAD and $MAX-\Delta pK_a$ for different DFT methods and solvation models using the 6-311++G(d,p) basis set and $\dot{X} = f^+(N_3)$ nucleophilic fukui function as descriptor.....                               | S-15 |
| S18: Statistics for the quinazoline derivatives training set: $R^2$ , MAD and $MAX-\Delta pK_a$ for different DFT methods and solvation models using the 6-311++G(d,p) basis set and $\dot{X} = \max\{f^+(N_1), f^+(N_3)\}$ nucleophilic fukui function as descriptor.....             | S-16 |
| S19: Statistics for the quinazoline derivatives training set: $R^2$ , MAD and $MAX-\Delta pK_a$ for different DFT methods and solvation models using the 6-311++G(d,p) basis set and $\dot{X} = \min\{f^+(N_1), f^+(N_3)\}$ nucleophilic fukui function as descriptor.....             | S-16 |
| S20: Statistics for the quinazoline derivatives training set: $R^2$ , MAD and $MAX-\Delta pK_a$ for different DFT methods and solvation models using the 6-311++G(d,p) basis set and $\dot{X} = \text{avg}\{f^+(N_1), f^+(N_3)\}$ nucleophilic fukui function as descriptor.....       | S-16 |
| S21: Statistics for the quinazoline derivatives training set: $R^2$ , MAD and $MAX-\Delta pK_a$ for different DFT methods and solvation models using the 6-311++G(d,p) basis set and $\dot{X} = \Delta f(N_1)$ condensed dual function as descriptor.....                              | S-17 |
| S22: Statistics for the quinazoline derivatives training set: $R^2$ , MAD and $MAX-\Delta pK_a$ for different DFT methods and solvation models using the 6-311++G(d,p) basis set and $\dot{X} = \Delta f(N_3)$ condensed dual function as descriptor.....                              | S-17 |
| S23: Statistics for the quinazoline derivatives training set: $R^2$ , MAD and $MAX-\Delta pK_a$ for different DFT methods and solvation models using the 6-311++G(d,p) basis set and $\dot{X} = \max\{\Delta f(N_1), \Delta f(N_3)\}$ condensed dual function as descriptor.....       | S-17 |
| S24: Statistics for the quinazoline derivatives training set: $R^2$ , MAD and $MAX-\Delta pK_a$ for different DFT methods and solvation models using the 6-311++G(d,p) basis set and $\dot{X} = \min\{\Delta f(N_1), \Delta f(N_3)\}$ condensed dual function as descriptor.....       | S-18 |
| S25: Statistics for the quinazoline derivatives training set: $R^2$ , MAD and $MAX-\Delta pK_a$ for different DFT methods and solvation models using the 6-311++G(d,p) basis set and $\dot{X} = \text{avg}\{\Delta f(N_1), \Delta f(N_3)\}$ condensed dual function as descriptor..... | S-18 |
| S26: Statistics for the quinazoline derivatives training set: $R^2$ , MAD and $MAX-\Delta pK_a$ for different DFT methods and solvation models using the 6-311++G(d,p) basis set and $\dot{X} = s^{(2)}(N_1)$ local hyper-softness ( $s^{(2)}$ ) as descriptor.....                    | S-18 |
| S27: Statistics for the quinazoline derivatives training set: $R^2$ , MAD and $MAX-\Delta pK_a$ for different DFT methods and solvation models using the 6-311++G(d,p) basis set and $\dot{X} = s^{(2)}(N_3)$ local hyper-softness ( $s^{(2)}$ ) as descriptor.....                    | S-19 |

S28: Statistics for the quinazoline derivatives training set:  $R^2$ , MAD and  $\text{MAX-}\Delta pK_a$  for different DFT methods and solvation models using the 6-311++G(d,p) basis set and  $\dot{X} = \max\{s^{(2)}(N_1), s^{(2)}(N_3)\}$  local hyper-softness ( $s^{(2)}$ ) as descriptor.....S-19

S29: Statistics for the quinazoline derivatives training set:  $R^2$ , MAD and  $\text{MAX-}\Delta pK_a$  for different DFT methods and solvation models using the 6-311++G(d,p) basis set and  $\dot{X} = \min\{s^{(2)}(N_1), s^{(2)}(N_3)\}$  local hyper-softness ( $s^{(2)}$ ) as descriptor.....S-19

S30: Statistics for the quinazoline derivatives training set:  $R^2$ , MAD and  $\text{MAX-}\Delta pK_a$  for different DFT methods and solvation models using the 6-311++G(d,p) basis set and  $\dot{X} = \text{avg}\{s^{(2)}(N_1), s^{(2)}(N_3)\}$  local hyper-softness ( $s^{(2)}$ ) as descriptor.....S-20

S31: Molecule number, experimental  $pK_a$ , predicted  $pK_a$  by using the linear equation  $pK_a = -5.726A + 19.082$  where  $A$  represents the calculated electron affinity, difference between experimental and predicted  $pK_a$  values for the training set (M06L/6-311++G(d,p)/CPCM).....S21

S32: Molecule number, experimental  $pK_a$ , predicted  $pK_a$  by using the linear equation  $pK_a = -5.726A + 19.082$  where  $A$  represents the calculated electron affinity, difference between experimental and predicted  $pK_a$  values for the test set (M06L/6-311++G(d,p)//CPCM).....S-22

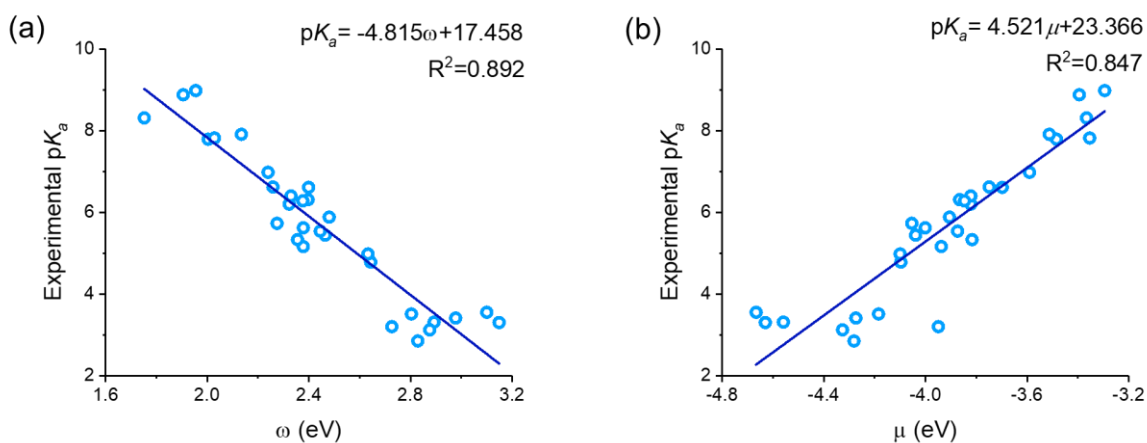

**Figure S1.** Linear regression between experimental  $pK_a$  and (a) calculated electrophilicity index ( $\omega$ ) and (b) calculated chemical potential ( $\mu$ ) at M06L/6-311++G(d,p) level of theory with CPCM solvation model.

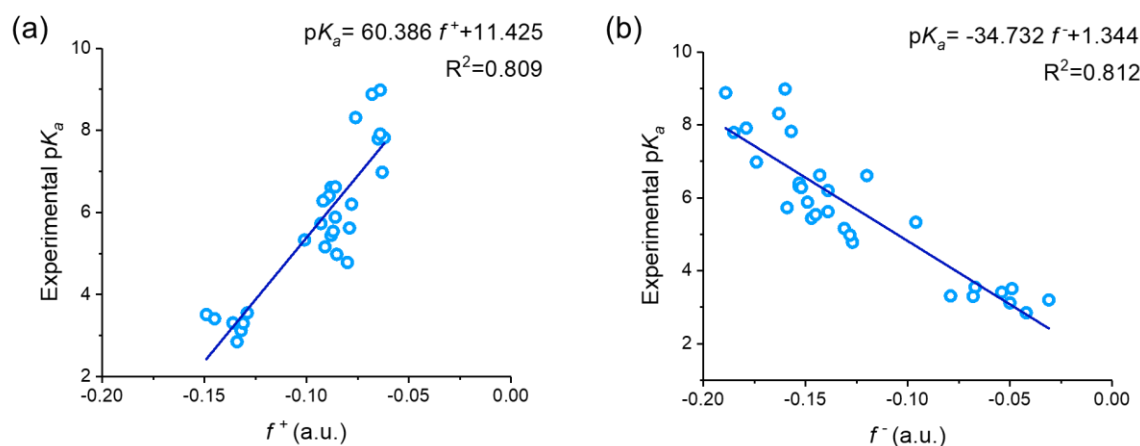

**Figure S2.** Linear regression between experimental  $pK_a$  and calculated (a) nucleophilic fukui function ( $f^+$ ) and (b) electrophilic fukui function ( $f^-$ ) on  $N_1$  atom at M06L/6-311++G(d,p) level of theory with CPCM solvation model.

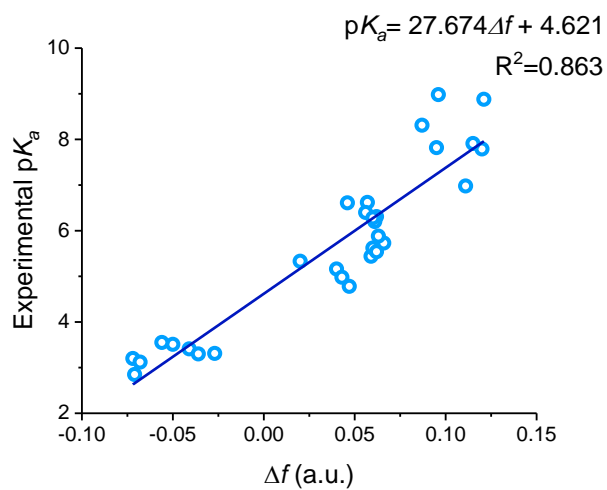

**Figure S3.** Linear regression between experimental  $pK_a$  and calculated condensed dual function ( $\Delta f = \max\{\Delta f(N_1), \Delta f(N_3)\}$ ) at M06L/6-311++G(d,p) level of theory with CPCM solvation model.

Table S1: Statistics for the quinazoline derivatives training set:  $R^2$ , MAD and  $\text{MAX-}\Delta pK_a$  for different DFT methods, basis sets and solvation models using the  $Q = q(N_1)$  atomic charge descriptor.

| <b>DFT/Basis Set</b>          | <b>Solvation Model</b> | <b><math>R^2</math></b> | <b>MAD</b> | <b><math>\text{MAX-}\Delta pK_a</math></b> |
|-------------------------------|------------------------|-------------------------|------------|--------------------------------------------|
| M06L/6-31+G(d)                | SMD                    | 0.900                   | 0.47       | -1.41                                      |
| M06L/6-311++G(d,p)            | SMD                    | 0.930                   | 0.40       | 1.05                                       |
| M06L/6-31+G(d)                | CPCM                   | 0.915                   | 0.41       | -1.24                                      |
| M06L/6-311++G(d,p)            | CPCM                   | 0.927                   | 0.40       | 0.96                                       |
| M062X/6-31+G(d)               | SMD                    | 0.864                   | 0.54       | -1.58                                      |
| M062X /6-311++G(d,p)          | SMD                    | 0.890                   | 0.47       | -1.40                                      |
| M062X /6-31+G(d)              | CPCM                   | 0.874                   | 0.50       | -1.56                                      |
| M062X /6-311++G(d,p)          | CPCM                   | 0.900                   | 0.45       | -1.26                                      |
| B3LYP/6-31+G(d)               | SMD                    | 0.874                   | 0.53       | -1.56                                      |
| B3LYP /6-311++G(d,p)          | SMD                    | 0.904                   | 0.45       | -1.27                                      |
| B3LYP /6-31+G(d)              | CPCM                   | 0.898                   | 0.46       | -1.18                                      |
| B3LYP /6-311++G(d,p)          | CPCM                   | 0.914                   | 0.47       | -1.48                                      |
| $\omega$ B97XD/6-31+G(d)      | SMD                    | 0.876                   | 0.53       | -1.51                                      |
| $\omega$ B97XD /6-311++G(d,p) | SMD                    | 0.902                   | 0.45       | -1.30                                      |
| $\omega$ B97XD /6-31+G(d)     | CPCM                   | 0.893                   | 0.47       | -1.52                                      |
| $\omega$ B97XD /6-311++G(d,p) | CPCM                   | 0.895                   | 0.47       | -1.24                                      |
| MN12SX/6-31+G(d)              | SMD                    | 0.865                   | 0.56       | 1.60                                       |
| MN12SX /6-311++G(d,p)         | SMD                    | 0.885                   | 0.48       | -1.49                                      |
| MN12SX /6-31+G(d)             | CPCM                   | 0.864                   | 0.51       | -1.52                                      |
| MN12SX /6-311++G(d,p)         | CPCM                   | 0.896                   | 0.47       | -1.36                                      |

Table S2: Statistics for the quinazoline derivatives training set:  $R^2$ , MAD and  $\text{MAX-}\Delta pK_a$  for different DFT methods, basis sets and solvation models using the  $Q = q(N_3)$  atomic charge descriptor.

| <b>DFT/Basis Set</b>          | <b>Solvation Model</b> | <b><math>R^2</math></b> | <b>MAD</b> | <b><math>\text{MAX-}\Delta pK_a</math></b> |
|-------------------------------|------------------------|-------------------------|------------|--------------------------------------------|
| M06L/6-31+G(d)                | SMD                    | 0.835                   | 0.57       | -1.77                                      |
| M06L/6-311++G(d,p)            | SMD                    | 0.816                   | 0.60       | -1.90                                      |
| M06L/6-31+G(d)                | CPCM                   | 0.864                   | 0.50       | -1.67                                      |
| M06L/6-311++G(d,p)            | CPCM                   | 0.822                   | 0.60       | -1.65                                      |
| M062X/6-31+G(d)               | SMD                    | 0.780                   | 0.65       | -2.13                                      |
| M062X /6-311++G(d,p)          | SMD                    | 0.789                   | 0.63       | -2.19                                      |
| M062X /6-31+G(d)              | CPCM                   | 0.809                   | 0.61       | -2.05                                      |
| M062X /6-311++G(d,p)          | CPCM                   | 0.816                   | 0.58       | -2.03                                      |
| B3LYP/6-31+G(d)               | SMD                    | 0.794                   | 0.60       | -2.17                                      |
| B3LYP /6-311++G(d,p)          | SMD                    | 0.804                   | 0.60       | -2.24                                      |
| B3LYP /6-31+G(d)              | CPCM                   | 0.834                   | 0.59       | -2.03                                      |
| B3LYP /6-311++G(d,p)          | CPCM                   | 0.834                   | 0.54       | -2.03                                      |
| $\omega$ B97XD/6-31+G(d)      | SMD                    | 0.787                   | 0.63       | -2.11                                      |
| $\omega$ B97XD /6-311++G(d,p) | SMD                    | 0.796                   | 0.61       | -2.17                                      |
| $\omega$ B97XD /6-31+G(d)     | CPCM                   | 0.818                   | 0.59       | -1.98                                      |
| $\omega$ B97XD /6-311++G(d,p) | CPCM                   | 0.790                   | 0.61       | -2.16                                      |
| MN12SX/6-31+G(d)              | SMD                    | 0.784                   | 0.64       | -2.05                                      |
| MN12SX /6-311++G(d,p)         | SMD                    | 0.814                   | 0.60       | -2.26                                      |
| MN12SX /6-31+G(d)             | CPCM                   | 0.820                   | 0.58       | -2.00                                      |
| MN12SX /6-311++G(d,p)         | CPCM                   | 0.815                   | 0.59       | -2.03                                      |

Table S3: Statistics for the quinazoline derivatives training set:  $R^2$ , MAD and  $\text{MAX-}\Delta pK_a$  for different DFT methods, basis sets and solvation models using the  $Q = \max\{q(N_1), q(N_3)\}$  atomic charge descriptor.

| DFT/Basis Set                 | Solvation Model | $R^2$ | MAD  | $\text{MAX-}\Delta pK_a$ |
|-------------------------------|-----------------|-------|------|--------------------------|
| M06L/6-31+G(d)                | SMD             | 0.898 | 0.47 | -1.39                    |
| M06L/6-311++G(d,p)            | SMD             | 0.925 | 0.39 | -1.20                    |
| M06L/6-31+G(d)                | CPCM            | 0.910 | 0.44 | -1.22                    |
| M06L/6-311++G(d,p)            | CPCM            | 0.922 | 0.41 | 1.01                     |
| M062X/6-31+G(d)               | SMD             | 0.857 | 0.55 | -1.54                    |
| M062X /6-311++G(d,p)          | SMD             | 0.882 | 0.49 | -1.34                    |
| M062X /6-31+G(d)              | CPCM            | 0.867 | 0.51 | 1.61                     |
| M062X /6-311++G(d,p)          | CPCM            | 0.903 | 0.44 | -1.20                    |
| B3LYP/6-31+G(d)               | SMD             | 0.864 | 0.52 | -1.30                    |
| B3LYP /6-311++G(d,p)          | SMD             | 0.889 | 0.48 | -1.47                    |
| B3LYP /6-31+G(d)              | CPCM            | 0.888 | 0.47 | 1.29                     |
| B3LYP /6-311++G(d,p)          | CPCM            | 0.899 | 0.47 | -1.33                    |
| $\omega$ B97XD/6-31+G(d)      | SMD             | 0.869 | 0.53 | -1.47                    |
| $\omega$ B97XD /6-311++G(d,p) | SMD             | 0.891 | 0.48 | -1.38                    |
| $\omega$ B97XD /6-31+G(d)     | CPCM            | 0.890 | 0.48 | -1.49                    |
| $\omega$ B97XD /6-311++G(d,p) | CPCM            | 0.892 | 0.46 | -1.31                    |
| MN12SX/6-31+G(d)              | SMD             | 0.853 | 0.56 | -1.58                    |
| MN12SX /6-311++G(d,p)         | SMD             | 0.878 | 0.50 | -1.47                    |
| MN12SX /6-31+G(d)             | CPCM            | 0.862 | 0.50 | -1.50                    |
| MN12SX /6-311++G(d,p)         | CPCM            | 0.891 | 0.48 | -1.32                    |

Table S4: Statistics for the quinazoline derivatives training set:  $R^2$ , MAD and  $\text{MAX-}\Delta pK_a$  for different DFT methods, basis sets and solvation models using the  $Q = \min\{q(N_1), q(N_3)\}$  atomic charge descriptor.

| DFT/Basis Set                 | Solvation Model | $R^2$ | MAD  | $\text{MAX-}\Delta pK_a$ |
|-------------------------------|-----------------|-------|------|--------------------------|
| M06L/6-31+G(d)                | SMD             | 0.862 | 0.54 | -1.44                    |
| M06L/6-311++G(d,p)            | SMD             | 0.873 | 0.52 | -1.49                    |
| M06L/6-31+G(d)                | CPCM            | 0.885 | 0.48 | -1.42                    |
| M06L/6-311++G(d,p)            | CPCM            | 0.863 | 0.53 | 1.35                     |
| M062X/6-31+G(d)               | SMD             | 0.829 | 0.59 | -1.74                    |
| M062X /6-311++G(d,p)          | SMD             | 0.851 | 0.55 | -1.77                    |
| M062X /6-31+G(d)              | CPCM            | 0.843 | 0.57 | -1.76                    |
| M062X /6-311++G(d,p)          | CPCM            | 0.858 | 0.52 | -1.70                    |
| B3LYP/6-31+G(d)               | SMD             | 0.850 | 0.54 | -1.61                    |
| B3LYP /6-311++G(d,p)          | SMD             | 0.867 | 0.52 | -1.66                    |
| B3LYP /6-31+G(d)              | CPCM            | 0.871 | 0.53 | -1.62                    |
| B3LYP /6-311++G(d,p)          | CPCM            | 0.884 | 0.47 | -1.70                    |
| $\omega$ B97XD/6-31+G(d)      | SMD             | 0.843 | 0.57 | -1.61                    |
| $\omega$ B97XD /6-311++G(d,p) | SMD             | 0.861 | 0.62 | -1.21                    |
| $\omega$ B97XD /6-31+G(d)     | CPCM            | 0.858 | 0.54 | -1.61                    |
| $\omega$ B97XD /6-311++G(d,p) | CPCM            | 0.839 | 0.55 | -1.86                    |
| MN12SX/6-31+G(d)              | SMD             | 0.824 | 0.60 | -1.70                    |
| MN12SX /6-311++G(d,p)         | SMD             | 0.847 | 0.56 | -1.82                    |
| MN12SX /6-31+G(d)             | CPCM            | 0.841 | 0.55 | -1.76                    |
| MN12SX /6-311++G(d,p)         | CPCM            | 0.846 | 0.56 | -1.75                    |

Table S5: Statistics for the quinazoline derivatives training set:  $R^2$ , MAD and  $\text{MAX-}\Delta pK_a$  for different DFT methods, basis sets and solvation models using the  $Q = \text{avg}\{q(N_1), q(N_3)\}$  atomic charge descriptor.

| DFT/Basis Set                 | Solvation Model | $R^2$ | MAD  | $\text{MAX-}\Delta pK_a$ |
|-------------------------------|-----------------|-------|------|--------------------------|
| M06L/6-31+G(d)                | SMD             | 0.899 | 0.48 | -1.17                    |
| M06L/6-311++G(d,p)            | SMD             | 0.906 | 0.43 | -1.33                    |
| M06L/6-31+G(d)                | CPCM            | 0.923 | 0.42 | -1.08                    |
| M06L/6-311++G(d,p)            | CPCM            | 0.904 | 0.45 | 1.18                     |
| M062X/6-31+G(d)               | SMD             | 0.870 | 0.53 | -1.38                    |
| M062X /6-311++G(d,p)          | SMD             | 0.882 | 0.48 | -1.49                    |
| M062X /6-31+G(d)              | CPCM            | 0.868 | 0.47 | -1.33                    |
| M062X /6-311++G(d,p)          | CPCM            | 0.900 | 0.43 | -1.39                    |
| B3LYP/6-31+G(d)               | SMD             | 0.874 | 0.50 | -1.40                    |
| B3LYP /6-311++G(d,p)          | SMD             | 0.890 | 0.47 | -1.54                    |
| B3LYP /6-31+G(d)              | CPCM            | 0.901 | 0.47 | -1.33                    |
| B3LYP /6-311++G(d,p)          | CPCM            | 0.905 | 0.45 | -1.48                    |
| $\omega$ B97XD/6-31+G(d)      | SMD             | 0.877 | 0.52 | -1.34                    |
| $\omega$ B97XD /6-311++G(d,p) | SMD             | 0.888 | 0.47 | -1.49                    |
| $\omega$ B97XD /6-31+G(d)     | CPCM            | 0.902 | 0.45 | -1.25                    |
| $\omega$ B97XD /6-311++G(d,p) | CPCM            | 0.883 | 0.46 | -1.55                    |
| MN12SX/6-31+G(d)              | SMD             | 0.862 | 0.56 | -1.37                    |
| MN12SX /6-311++G(d,p)         | SMD             | 0.876 | 0.50 | -1.61                    |
| MN12SX /6-31+G(d)             | CPCM            | 0.881 | 0.48 | -1.39                    |
| MN12SX /6-311++G(d,p)         | CPCM            | 0.888 | 0.47 | -1.45                    |

Table S6: Statistics for the quinazoline derivatives training set:  $R^2$ , MAD and  $\text{MAX-}\Delta pK_a$  for different DFT methods and solvation models using the 6-311++G(d,p) basis set and ionization energy ( $I$ ) as descriptor.

| DFT   | Solvation Model | $R^2$ | MAD  | $\text{MAX-}\Delta pK_a$ |
|-------|-----------------|-------|------|--------------------------|
| M06L  | CPCM            | 0.760 | 0.68 | 2.84                     |
| M06L  | SMD             | 0.742 | 0.70 | 2.81                     |
| B3LYP | CPCM            | 0.660 | 0.80 | 3.00                     |
| B3LYP | SMD             | 0.546 | 0.95 | 3.20                     |

Table S7: Statistics for the quinazoline derivatives training set:  $R^2$ , MAD and  $\text{MAX-}\Delta pK_a$  for different DFT methods and solvation models using the 6-311++G(d,p) basis set and electron affinity ( $A$ ) as descriptor.

| DFT   | Solvation Model | $R^2$ | MAD  | $\text{MAX-}\Delta pK_a$ |
|-------|-----------------|-------|------|--------------------------|
| M06L  | CPCM            | 0.893 | 0.44 | 1.47                     |
| M06L  | SMD             | 0.853 | 0.59 | -1.57                    |
| B3LYP | CPCM            | 0.724 | 0.75 | -1.99                    |
| B3LYP | SMD             | 0.700 | 0.81 | -2.09                    |

Table S8: Statistics for the quinazoline derivatives training set:  $R^2$ , MAD and  $\text{MAX-}\Delta pK_a$  for different DFT methods and solvation models using the 6-311++G(d,p) basis set and electrophilicity index ( $\omega$ ) as descriptor.

| DFT   | Solvation Model | $R^2$ | MAD  | $\text{MAX-}\Delta pK_a$ |
|-------|-----------------|-------|------|--------------------------|
| M06L  | CPCM            | 0.892 | 0.48 | 1.13                     |
| M06L  | SMD             | 0.850 | 0.56 | -1.30                    |
| B3LYP | CPCM            | 0.726 | 0.73 | -2.01                    |
| B3LYP | SMD             | 0.707 | 0.80 | -2.12                    |

Table S9: Statistics for the quinazoline derivatives training set:  $R^2$ , MAD and  $MAX-\Delta pK_a$  for different DFT methods and solvation models using the 6-311++G(d,p) basis set and chemical hardness ( $\eta$ ) as descriptor.

| DFT   | Solvation Model | $R^2$ | MAD  | $MAX-\Delta pK_a$ |
|-------|-----------------|-------|------|-------------------|
| M06L  | CPCM            | 0.266 | 1.18 | 3.67              |
| M06L  | SMD             | 0.142 | 1.32 | 3.47              |
| B3LYP | CPCM            | 0.261 | 1.23 | 3.62              |
| B3LYP | SMD             | 0.171 | 1.34 | 3.52              |

Table S10: Statistics for the quinazoline derivatives training set:  $R^2$ , MAD and  $MAX-\Delta pK_a$  for different DFT methods and solvation models using the 6-311++G(d,p) basis set and chemical potential ( $\mu$ ) as descriptor.

| DFT   | Solvation Model | $R^2$ | MAD  | $MAX-\Delta pK_a$ |
|-------|-----------------|-------|------|-------------------|
| M06L  | CPCM            | 0.847 | 0.53 | 2.31              |
| M06L  | SMD             | 0.829 | 0.56 | 2.24              |
| B3LYP | CPCM            | 0.725 | 0.74 | 2.53              |
| B3LYP | SMD             | 0.640 | 0.83 | 2.75              |

Table S11: Statistics for the quinazoline derivatives training set:  $R^2$ , MAD and  $MAX-\Delta pK_a$  for different DFT methods and solvation models using the 6-311++G(d,p) basis set and  $\dot{X}=f^-(N_i)$  electrophilic fukui function as descriptor.

| DFT   | Solvation Model | $R^2$ | MAD  | $MAX-\Delta pK_a$ |
|-------|-----------------|-------|------|-------------------|
| M06L  | CPCM            | 0.812 | 0.62 | -2.08             |
| M06L  | SMD             | 0.766 | 0.69 | -2.29             |
| B3LYP | CPCM            | 0.799 | 0.59 | -2.56             |
| B3LYP | SMD             | 0.773 | 0.64 | -2.39             |

Table S12: Statistics for the quinazoline derivatives training set:  $R^2$ , MAD and  $\text{MAX-}\Delta pK_a$  for different DFT methods and solvation models using the 6-311++G(d,p) basis set and  $\dot{X} = f^-(N_3)$  electrophilic fukui function as descriptor.

| DFT   | Solvation Model | $R^2$ | MAD  | $\text{MAX-}\Delta pK_a$ |
|-------|-----------------|-------|------|--------------------------|
| M06L  | CPCM            | 0.030 | 1.50 | -3.11                    |
| M06L  | SMD             | 0.001 | 1.45 | -3.36                    |
| B3LYP | CPCM            | 0.006 | 1.49 | -3.17                    |
| B3LYP | SMD             | 0.001 | 1.45 | -3.38                    |

Table S13: Statistics for the quinazoline derivatives training set:  $R^2$ , MAD and  $\text{MAX-}\Delta pK_a$  for different DFT methods and solvation models using the 6-311++G(d,p) basis set and  $\dot{X} = \max\{f^-(N_1), f^-(N_3)\}$  electrophilic fukui function as descriptor.

| DFT   | Solvation Model | $R^2$ | MAD  | $\text{MAX-}\Delta pK_a$ |
|-------|-----------------|-------|------|--------------------------|
| M06L  | CPCM            | 0.030 | 1.50 | -3.11                    |
| M06L  | SMD             | 0.001 | 1.45 | -3.37                    |
| B3LYP | CPCM            | 0.004 | 1.48 | -3.19                    |
| B3LYP | SMD             | 0.001 | 1.45 | -3.39                    |

Table S14: Statistics for the quinazoline derivatives training set:  $R^2$ , MAD and  $\text{MAX-}\Delta pK_a$  for different DFT methods and solvation models using the 6-311++G(d,p) basis set and  $\dot{X} = \min\{f^-(N_1), f^-(N_3)\}$  electrophilic fukui function as descriptor.

| DFT   | Solvation Model | $R^2$ | MAD  | $\text{MAX-}\Delta pK_a$ |
|-------|-----------------|-------|------|--------------------------|
| M06L  | CPCM            | 0.812 | 0.62 | -2.08                    |
| M06L  | SMD             | 0.768 | 0.69 | -2.28                    |
| B3LYP | CPCM            | 0.801 | 0.59 | -2.56                    |
| B3LYP | SMD             | 0.774 | 0.64 | -2.39                    |

Table S15: Statistics for the quinazoline derivatives training set:  $R^2$ , MAD and  $\text{MAX-}\Delta pK_a$  for different DFT methods and solvation models using the 6-311++G(d,p) basis set and  $\dot{X} = \text{avg}\{f^-(N_1), f^-(N_3)\}$  electrophilic fukui function as descriptor.

| DFT   | Solvation Model | $R^2$ | MAD  | $\text{MAX-}\Delta pK_a$ |
|-------|-----------------|-------|------|--------------------------|
| M06L  | CPCM            | 0.587 | 0.91 | -2.67                    |
| M06L  | SMD             | 0.574 | 0.94 | -2.97                    |
| B3LYP | CPCM            | 0.622 | 0.84 | -3.24                    |
| B3LYP | SMD             | 0.578 | 0.93 | -3.14                    |

Table S16: Statistics for the quinazoline derivatives training set:  $R^2$ , MAD and  $\text{MAX-}\Delta pK_a$  for different DFT methods and solvation models using the 6-311++G(d,p) basis set and  $\dot{X} = f^+(N_1)$  nucleophilic fukui function as descriptor.

| DFT   | Solvation Model | $R^2$ | MAD  | $\text{MAX-}\Delta pK_a$ |
|-------|-----------------|-------|------|--------------------------|
| M06L  | CPCM            | 0.809 | 0.61 | 1.81                     |
| M06L  | SMD             | 0.787 | 0.68 | -1.59                    |
| B3LYP | CPCM            | 0.833 | 0.58 | 1.79                     |
| B3LYP | SMD             | 0.786 | 0.68 | -1.64                    |

Table S17: Statistics for the quinazoline derivatives training set:  $R^2$ , MAD and  $\text{MAX-}\Delta pK_a$  for different DFT methods and solvation models using the 6-311++G(d,p) basis set and  $\dot{X} = f^+(N_3)$  nucleophilic fukui function as descriptor.

| DFT   | Solvation Model | $R^2$ | MAD  | $\text{MAX-}\Delta pK_a$ |
|-------|-----------------|-------|------|--------------------------|
| M06L  | CPCM            | 0.031 | 1.43 | -3.50                    |
| M06L  | SMD             | 0.027 | 1.43 | -3.54                    |
| B3LYP | CPCM            | 0.036 | 1.43 | -3.60                    |
| B3LYP | SMD             | 0.042 | 1.41 | -3.66                    |

Table S18: Statistics for the quinazoline derivatives training set:  $R^2$ , MAD and  $\text{MAX-}\Delta pK_a$  for different DFT methods and solvation models using the 6-311++G(d,p) basis set and  $\dot{X} = \max\{f^+(N_1), f^+(N_3)\}$  nucleophilic fukui function as descriptor.

| DFT   | Solvation Model | $R^2$ | MAD  | $\text{MAX-}\Delta pK_a$ |
|-------|-----------------|-------|------|--------------------------|
| M06L  | CPCM            | 0.115 | 1.35 | -3.59                    |
| M06L  | SMD             | 0.109 | 1.35 | -3.66                    |
| B3LYP | CPCM            | 0.140 | 1.35 | -3.73                    |
| B3LYP | SMD             | 0.146 | 1.32 | -3.74                    |

Table S19: Statistics for the quinazoline derivatives training set:  $R^2$ , MAD and  $\text{MAX-}\Delta pK_a$  for different DFT methods and solvation models using the 6-311++G(d,p) basis set and  $\dot{X} = \min\{f^+(N_1), f^+(N_3)\}$  nucleophilic fukui function as descriptor.

| DFT   | Solvation Model | $R^2$ | MAD  | $\text{MAX-}\Delta pK_a$ |
|-------|-----------------|-------|------|--------------------------|
| M06L  | CPCM            | 0.641 | 0.84 | -2.63                    |
| M06L  | SMD             | 0.641 | 0.90 | -2.05                    |
| B3LYP | CPCM            | 0.720 | 0.74 | 2.28                     |
| B3LYP | SMD             | 0.706 | 0.80 | -2.22                    |

Table S20: Statistics for the quinazoline derivatives training set:  $R^2$ , MAD and  $\text{MAX-}\Delta pK_a$  for different DFT methods and solvation models using the 6-311++G(d,p) basis set and  $\dot{X} = \text{avg}\{f^+(N_1), f^+(N_3)\}$  nucleophilic fukui function as descriptor.

| DFT   | Solvation Model | $R^2$ | MAD  | $\text{MAX-}\Delta pK_a$ |
|-------|-----------------|-------|------|--------------------------|
| M06L  | CPCM            | 0.309 | 1.18 | -3.17                    |
| M06L  | SMD             | 0.304 | 1.19 | -3.35                    |
| B3LYP | CPCM            | 0.356 | 1.16 | -3.45                    |
| B3LYP | SMD             | 0.392 | 1.08 | -3.46                    |

Table S21: Statistics for the quinazoline derivatives training set:  $R^2$ , MAD and  $\text{MAX-}\Delta pK_a$  for different DFT methods and solvation models using the 6-311++G(d,p) basis set and  $\dot{X} = \Delta f(N_1)$  condensed dual function as descriptor.

| DFT   | Solvation Model | $R^2$ | MAD  | $\text{MAX-}\Delta pK_a$ |
|-------|-----------------|-------|------|--------------------------|
| M06L  | CPCM            | 0.836 | 0.58 | -1.79                    |
| M06L  | SMD             | 0.795 | 0.66 | -2.01                    |
| B3LYP | CPCM            | 0.840 | 0.53 | -2.21                    |
| B3LYP | SMD             | 0.804 | 0.62 | -2.08                    |

Table S22: Statistics for the quinazoline derivatives training set:  $R^2$ , MAD and  $\text{MAX-}\Delta pK_a$  for different DFT methods and solvation models using the 6-311++G(d,p) basis set and  $\dot{X} = \Delta f(N_3)$  condensed dual function as descriptor.

| DFT   | Solvation Model | $R^2$ | MAD  | $\text{MAX-}\Delta pK_a$ |
|-------|-----------------|-------|------|--------------------------|
| M06L  | CPCM            | 0.007 | 1.44 | -3.43                    |
| M06L  | SMD             | 0.018 | 1.43 | -3.53                    |
| B3LYP | CPCM            | 0.015 | 1.43 | -3.54                    |
| B3LYP | SMD             | 0.025 | 1.42 | -3.62                    |

Table S23: Statistics for the quinazoline derivatives training set:  $R^2$ , MAD and  $\text{MAX-}\Delta pK_a$  for different DFT methods and solvation models using the 6-311++G(d,p) basis set and  $\dot{X} = \max\{\Delta f(N_1), \Delta f(N_3)\}$  condensed dual function as descriptor.

| DFT   | Solvation Model | $R^2$ | MAD  | $\text{MAX-}\Delta pK_a$ |
|-------|-----------------|-------|------|--------------------------|
| M06L  | CPCM            | 0.863 | 0.53 | -1.70                    |
| M06L  | SMD             | 0.850 | 0.55 | -1.97                    |
| B3LYP | CPCM            | 0.849 | 0.48 | -2.33                    |
| B3LYP | SMD             | 0.840 | 0.54 | -2.22                    |

Table S24: Statistics for the quinazoline derivatives training set:  $R^2$ , MAD and  $\text{MAX-}\Delta pK_a$  for different DFT methods and solvation models using the 6-311++G(d,p) basis set and  $\dot{X} = \min\{\Delta f(N_1), \Delta f(N_3)\}$  condensed dual function as descriptor.

| DFT   | Solvation Model | $R^2$ | MAD  | $\text{MAX-}\Delta pK_a$ |
|-------|-----------------|-------|------|--------------------------|
| M06L  | CPCM            | 0.061 | 1.39 | -3.53                    |
| M06L  | SMD             | 0.072 | 1.39 | -3.62                    |
| B3LYP | CPCM            | 0.077 | 1.36 | -3.69                    |
| B3LYP | SMD             | 0.085 | 1.38 | -3.72                    |

Table S25: Statistics for the quinazoline derivatives training set:  $R^2$ , MAD and  $\text{MAX-}\Delta pK_a$  for different DFT methods and solvation models using the 6-311++G(d,p) basis set and  $\dot{X} = \text{avg}\{\Delta f(N_1), \Delta f(N_3)\}$  condensed dual function as descriptor.

| DFT   | Solvation Model | $R^2$ | MAD  | $\text{MAX-}\Delta pK_a$ |
|-------|-----------------|-------|------|--------------------------|
| M06L  | CPCM            | 0.497 | 1.00 | -2.91                    |
| M06L  | SMD             | 0.492 | 1.02 | -3.17                    |
| B3LYP | CPCM            | 0.531 | 0.93 | -3.36                    |
| B3LYP | SMD             | 0.533 | 0.95 | -3.30                    |

Table S26: Statistics for the quinazoline derivatives training set:  $R^2$ , MAD and  $\text{MAX-}\Delta pK_a$  for different DFT methods and solvation models using the 6-311++G(d,p) basis set and  $\dot{X} = s^{(2)}(N_1)$  local hyper-softness ( $s^{(2)}$ ) as descriptor.

| DFT   | Solvation Model | $R^2$ | MAD  | $\text{MAX-}\Delta pK_a$ |
|-------|-----------------|-------|------|--------------------------|
| M06L  | CPCM            | 0.853 | 0.55 | -1.56                    |
| M06L  | SMD             | 0.807 | 0.65 | -1.65                    |
| B3LYP | CPCM            | 0.840 | 0.57 | -2.00                    |
| B3LYP | SMD             | 0.805 | 0.65 | -1.83                    |

Table S27: Statistics for the quinazoline derivatives training set:  $R^2$ , MAD and  $\text{MAX-}\Delta pK_a$  for different DFT methods and solvation models using the 6-311++G(d,p) basis set and  $\dot{X} = s^{(2)}(N_3)$  local hyper-softness ( $s^{(2)}$ ) as descriptor.

| DFT   | Solvation Model | $R^2$ | MAD  | $\text{MAX-}\Delta pK_a$ |
|-------|-----------------|-------|------|--------------------------|
| M06L  | CPCM            | 0.001 | 1.45 | -3.37                    |
| M06L  | SMD             | 0.008 | 1.44 | -3.49                    |
| B3LYP | CPCM            | 0.005 | 1.44 | -3.47                    |
| B3LYP | SMD             | 0.012 | 1.43 | -3.56                    |

Table S28: Statistics for the quinazoline derivatives training set:  $R^2$ , MAD and  $\text{MAX-}\Delta pK_a$  for different DFT methods and solvation models using the 6-311++G(d,p) basis set and  $\dot{X} = \max\{s^{(2)}(N_1), s^{(2)}(N_3)\}$  local hyper-softness ( $s^{(2)}$ ) as descriptor.

| DFT   | Solvation Model | $R^2$ | MAD  | $\text{MAX-}\Delta pK_a$ |
|-------|-----------------|-------|------|--------------------------|
| M06L  | CPCM            | 0.883 | 0.47 | -1.58                    |
| M06L  | SMD             | 0.872 | 0.52 | -1.48                    |
| B3LYP | CPCM            | 0.857 | 0.49 | -2.07                    |
| B3LYP | SMD             | 0.847 | 0.52 | -1.92                    |

Table S29: Statistics for the quinazoline derivatives training set:  $R^2$ , MAD and  $\text{MAX-}\Delta pK_a$  for different DFT methods and solvation models using the 6-311++G(d,p) basis set and  $\dot{X} = \min\{s^{(2)}(N_1), s^{(2)}(N_3)\}$  local hyper-softness ( $s^{(2)}$ ) as descriptor.

| DFT   | Solvation Model | $R^2$ | MAD  | $\text{MAX-}\Delta pK_a$ |
|-------|-----------------|-------|------|--------------------------|
| M06L  | CPCM            | 0.037 | 1.41 | -3.54                    |
| M06L  | SMD             | 0.053 | 1.40 | -3.64                    |
| B3LYP | CPCM            | 0.050 | 1.39 | -3.69                    |
| B3LYP | SMD             | 0.060 | 1.40 | -3.74                    |

Table S30: Statistics for the quinazoline derivatives training set:  $R^2$ , MAD and  $\text{MAX-}\Delta pK_a$  for different DFT methods and solvation models using the 6-311++G(d,p) basis set and  $\bar{X} = \text{avg}\{s^{(2)}(N_1), s^{(2)}(N_3)\}$  local hyper-softness ( $s^{(2)}$ ) as descriptor.

| <b>DFT</b> | <b>Solvation Model</b> | <b><math>R^2</math></b> | <b>MAD</b> | <b><math>\text{MAX-}\Delta pK_a</math></b> |
|------------|------------------------|-------------------------|------------|--------------------------------------------|
| M06L       | CPCM                   | 0.521                   | 0.99       | -2.74                                      |
| M06L       | SMD                    | 0.510                   | 1.03       | -3.04                                      |
| B3LYP      | CPCM                   | 0.537                   | 0.93       | -3.35                                      |
| B3LYP      | SMD                    | 0.554                   | 0.95       | -3.24                                      |

Table S31: Molecule number, experimental  $pK_a$ , predicted  $pK_a$  by using the linear equation  $pK_a = -5.714A + 19.061$  where  $A$  represents the calculated electron affinity, difference between experimental and predicted  $pK_a$  values for the training set (M06L/6-311++G(d,p)//CPCM).

| Molecule number | $pK_a$ (exp.) | $pK_a$ (pred.) | $\Delta pK_a$ |
|-----------------|---------------|----------------|---------------|
| 1               | 3.31          | 3.27           | -0.04         |
| 3               | 5.73          | 6.22           | 0.49          |
| 4               | 3.20          | 4.67           | 1.47          |
| 7               | 2.85          | 3.85           | 1.00          |
| 8               | 3.51          | 4.07           | 0.56          |
| 9               | 3.12          | 3.64           | 0.52          |
| 10              | 3.41          | 3.40           | -0.01         |
| 11              | 3.55          | 2.43           | -1.12         |
| 12              | 3.30          | 2.33           | -0.97         |
| 15              | 5.44          | 5.44           | 0.00          |
| 16              | 5.16          | 5.88           | 0.72          |
| 17              | 5.33          | 6.09           | 0.76          |
| 18              | 5.62          | 5.81           | 0.19          |
| 21              | 4.78          | 4.72           | -0.06         |
| 22              | 4.98          | 4.75           | -0.23         |
| 23              | 7.79          | 7.81           | 0.02          |
| 24              | 7.82          | 7.82           | 0.00          |
| 25              | 8.31          | 9.07           | 0.76          |
| 26              | 6.98          | 6.77           | -0.21         |
| 27              | 6.31          | 5.88           | -0.43         |
| 28              | 6.61          | 6.07           | -0.54         |
| 29              | 6.20          | 6.21           | 0.01          |
| 32              | 8.88          | 8.30           | -0.58         |
| 33              | 7.91          | 7.25           | -0.66         |
| 34              | 8.98          | 8.17           | -0.81         |
| 36              | 6.62          | 6.53           | -0.09         |
| 37              | 6.40          | 6.18           | -0.22         |
| 38              | 6.28          | 5.98           | -0.30         |
| 39              | 5.88          | 5.53           | -0.35         |
| 40              | 5.54          | 5.70           | 0.16          |

Table S32: Molecule number, experimental  $pK_a$ , predicted  $pK_a$  by using the linear equation  $pK_a = -5.714A + 19.061$  where  $A$  represents the calculated electron affinity, difference between experimental and predicted  $pK_a$  values for the test set (M06L/6-311++G(d,p)//CPCM).

| <b>Molecule number</b> | <b><math>pK_a</math> (exp.)</b> | <b><math>pK_a</math> (pred.)</b> | <b><math>\Delta pK_a</math></b> |
|------------------------|---------------------------------|----------------------------------|---------------------------------|
| 2                      | 4.43                            | 4.67                             | 0.24                            |
| 5                      | 2.40                            | 4.42                             | 2.02                            |
| 6                      | 3.13                            | 5.54                             | 2.41                            |
| 13                     | 4.18                            | -2.75                            | -6.93                           |
| 14                     | 4.00                            | -1.76                            | -5.76                           |
| 19                     | 4.54                            | -1.70                            | -6.24                           |
| 20                     | 4.27                            | -2.34                            | -6.61                           |
| 30                     | 6.52                            | 6.26                             | -0.26                           |
| 31                     | 5.88                            | 5.20                             | -0.68                           |
| 35                     | 6.63                            | 0.43                             | -6.20                           |
| 41                     | 5.03                            | 5.46                             | 0.43                            |
| 42                     | 6.02                            | 5.57                             | -0.45                           |
| 43                     | 6.08                            | 3.62                             | -2.46                           |
| 44                     | 5.37                            | 3.94                             | -1.43                           |
| 45                     | 5.28                            | 3.56                             | -1.72                           |
| 46                     | 5.77                            | 5.34                             | -0.43                           |
